# Supplementary material
Source: Springer Nature journal article supplement (https://www.springermedizin.de/resource/supplementary/12874_2009_383_MOESM10_ESM.pdf/9434358)

Number of original articles/ 100 billions GDP (US dollar)/year

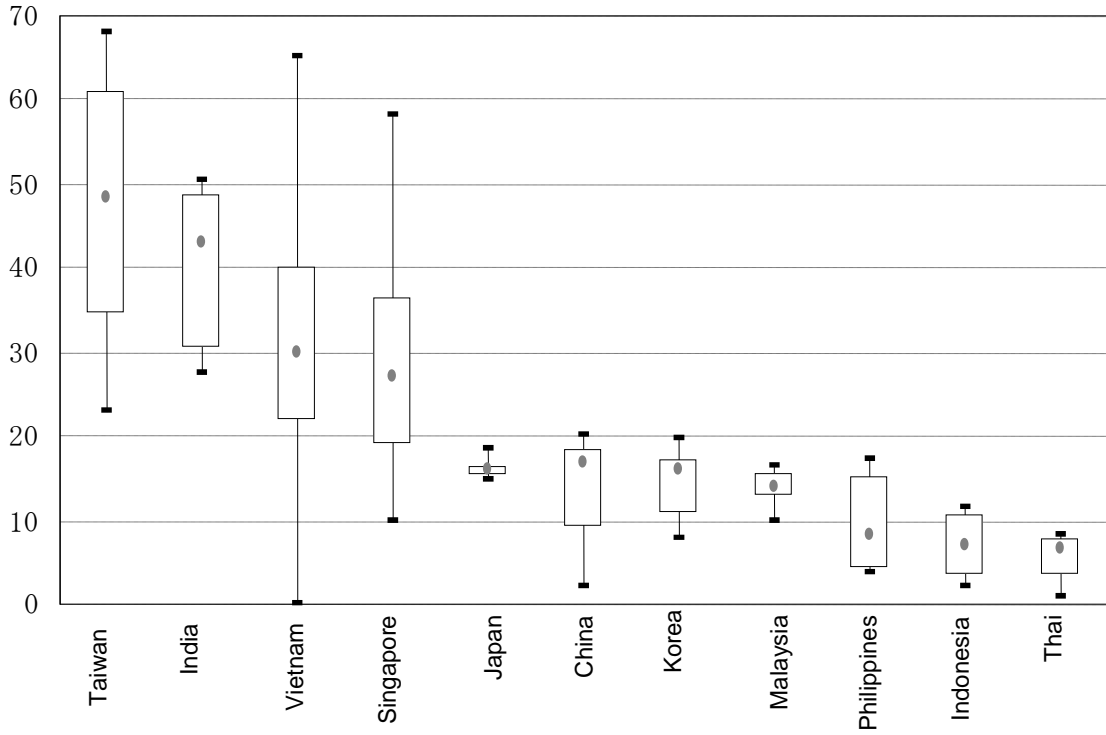

Supplement: MOESM10 [file 9434358]
